# Supplementary material for: New Imidazolium Alkaloids with Broad Spectrum of Action from the Marine Bacterium Shewanella aquimarina
Source: MDPI journal article supplement (doi:10.3390/pharmaceutics15082139), 2023-08-14
Supplement: s1 [file s1]

Supplementary Materials

# New Imidazolium Alkaloids with Broad Spectrum of Action from the Marine Bacterium *Shewanella aquimarina*

Rosa Giugliano <sup>1,†</sup>, Gerardo Della Sala <sup>2,†</sup>, Carmine Buonocore <sup>2,†</sup>, Carla Zannella <sup>1</sup>, Pietro Tedesco <sup>2</sup>, Fortunato Palma Esposito <sup>2</sup>, Costanza Ragozzino <sup>2,3</sup>, Annalisa Chianese <sup>1</sup>, Maria Vittoria Morone <sup>1</sup>, Valerio Mazzella <sup>4,5</sup>, Laura Núñez-Pons <sup>5,6</sup>, Veronica Folliero <sup>7</sup>, Gianluigi Franci <sup>7</sup>, Anna De Filippis <sup>1</sup>, Massimiliano Galdiero <sup>1,\*</sup> and Donatella de Pascale <sup>2,\*</sup>

<sup>1</sup> Department of Experimental Medicine, University of Campania “Luigi Vanvitelli”, 80138 Naples, Italy; rosa.giugliano@unicampania.it (R.G.); carla.zannella@unicampania.it (C.Z.); annalisa.chianese@unicampania.it (A.C.); mariavittoria.morone@unicampania.it (M.V.M.); anna.defilippis@unicampania.it (A.D.F.)

<sup>2</sup> Department of Ecosustainable Marine Biotechnology, Stazione Zoologica Anton Dohrn, Via Ammiraglio Acton, 55, 80133 Naples, Italy; gerardo.dellasala@szn.it (G.D.S.); carmine.buonocore@szn.it (C.B.); pietro.tedesco@szn.it (P.T.); fortunato.palmaesposito@szn.it (F.P.E.); costanza.ragozzino@studenti.unime.it (C.R.)

<sup>3</sup> Department of Chemical, Biological, Pharmaceutical and Environmental Sciences, University of Messina, Viale F. Stagno d’Alcontres 31, 98166 Messina, Italy

<sup>4</sup> Department of Integrative Marine Ecology (EMI), Stazione Zoologica Anton Dohrn, Ischia Marine Centre, Ischia, 80077 Naples, Italy; valerio.mazzella@szn.it

<sup>5</sup> NBFC, National Biodiversity Future Center, 90133 Palermo, Italy; laura.nunezpons@szn.it

<sup>6</sup> Department of Integrative Marine Ecology (EMI), Stazione Zoologica Anton Dohrn, Villa Comunale, 80121 Napoli, Italy

<sup>7</sup> Department of Medicine, Surgery and Dentistry “Scuola Medica Salernitana”, University of Salerno, 84081 Baronissi, Italy; vfolliero@unisa.it (V.F.); gfranci@unisa.it (G.F.)

\* Correspondence: massimiliano.galdiero@unicampania.it (M.G.); donatella.depascale@szn.it (D.d.P.)

† These authors contributed equally to this work.

|                                                                                         |          |
|-----------------------------------------------------------------------------------------|----------|
| <b>Contents</b>                                                                         | <b>2</b> |
| Table S1: Diketopiperazines from <i>Shewanella aquimarina</i>                           | 3        |
| Figure S1. Neutral loss/precursor <i>m/z</i> plot from HR-MS/MS data of the F2 fraction | 3        |
| Figure S2. Biofilm degradation                                                          | 4        |
| Figure S3. Antiviral activity vs HSV-1                                                  | 4        |
| Figure S4. Antiviral activity vs HCoV-229E                                              | 5        |
| Figure S5: Antiviral activity vs PV-1                                                   | 5        |
| Figure S6: MRSA antibiogram                                                             | 6        |
| Figure S7: MSSA antibiogram                                                             | 7        |
| Figure S8: β—Lactamase antibiogram                                                      | 8        |
| Figure S9: QRSA antibiogram                                                             | 9        |
| Figure S10: MLSB antibiogram                                                            | 10       |

**Table S1.** Diketopiperazines from *Shewanella aquimarina*.

| Diketopiperazines from F2 |       |                       |          |
|---------------------------|-------|-----------------------|----------|
| Diketopiperazine          | $R_t$ | $[M+H]^+$             | $m/z$    |
| cyclo(Leu-Val)            | 11.9  | $C_{11}H_{19}N_2O_2$  | 213.1603 |
| cyclo(Met-Pro), S-Oxide   | 1.4   | $C_{10}H_{16}N_2SO_3$ | 245.0959 |
| cyclo(Phe-Pro)            | 11.4  | $C_{14}H_{17}N_2O_2$  | 245.1290 |
| cyclo(Tyr-Pro)            | 4.9   | $C_{14}H_{17}N_2O_3$  | 261.1239 |
| cyclo(Ile-Pro)            | 9.4   | $C_{11}H_{19}N_2O_2$  | 211.1447 |
| cyclo(His-Pro)            | 0.8   | $C_{11}H_{15}N_4O_2$  | 235.1192 |

### Neutral loss/precursor $m/z$ plot

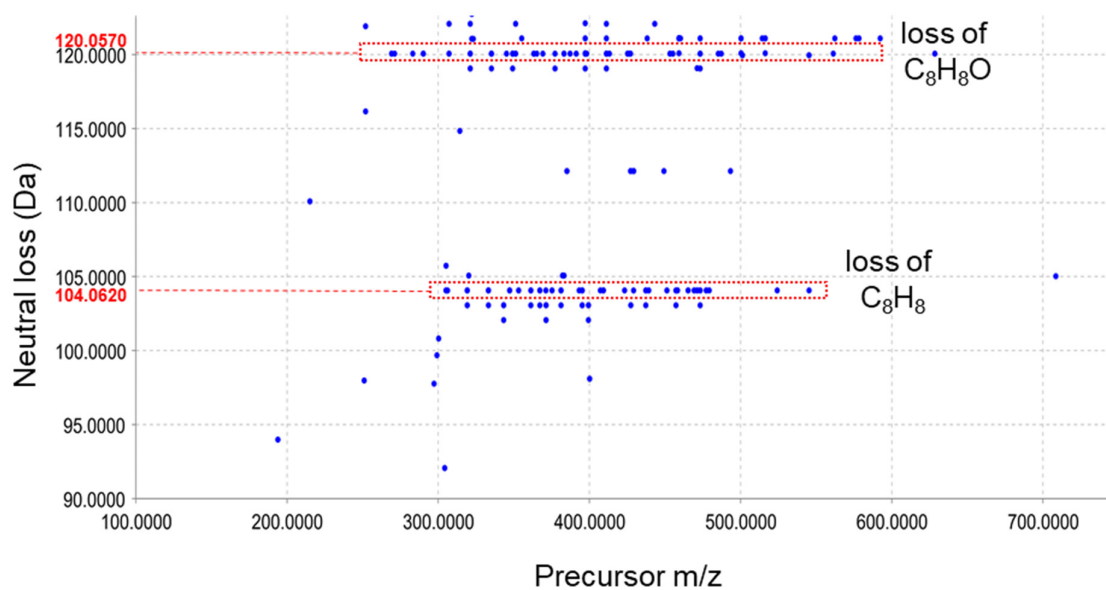**Figure S1.** Neutral loss/precursor  $m/z$  plot from HR-MS/MS data of the F2 fraction from *Shewanella aquimarina*. Precursor ions sharing neutral losses of  $C_8H_8$  (104.0620 Da) and/or  $C_8H_8O$  (120.0570 Da), are highlighted in red.

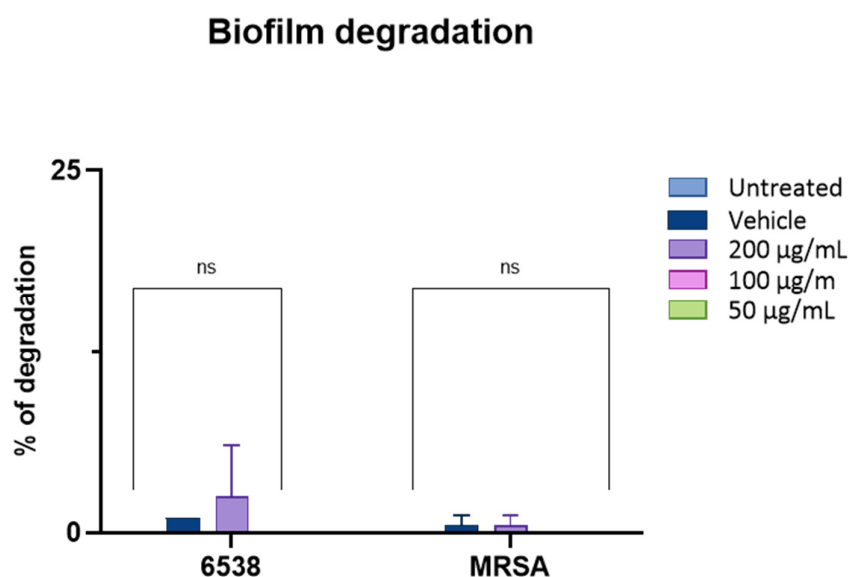

**Figure S2.** Biofilm degradation activity of F2 against *S. aureus* 6538 and MRSA. Statistical analyses were determined by two-way ANOVA with Dunnett's test for multiple comparisons referred to the untreated bacteria. ns (not statistically significant).

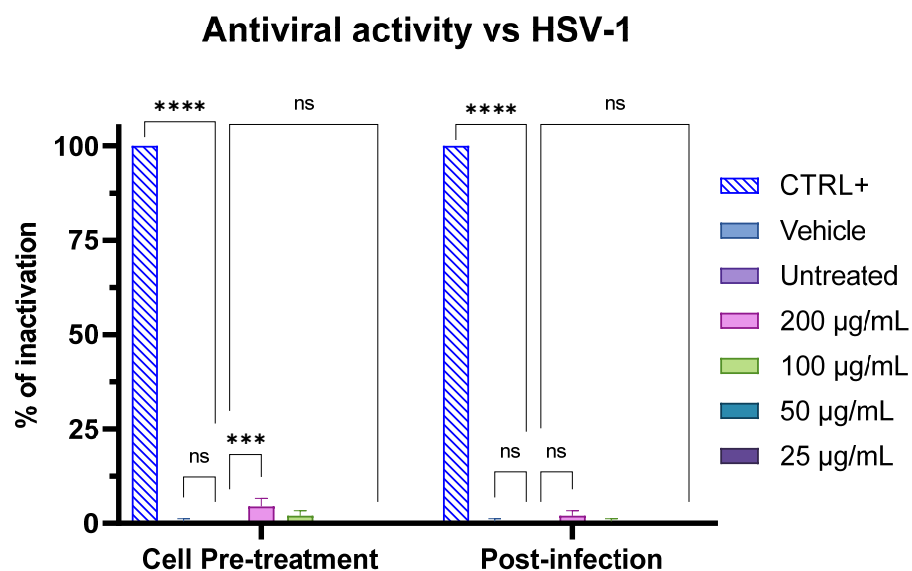

**Figure S3.** Antiviral activity of F2 against HSV-1 in the cell pre-treatment and post-infection assays. Dextran sulfate (1 µM) and aciclovir (5 µM) were used for cell pretreatment and post-treatment, respectively. Statistical analyses were determined by two-way ANOVA with Dunnett's test for multiple comparisons referred to the untreated infected cells \*\*\*\*  $p < 0.0001$ , \*\*\*  $p < 0.0002$ , ns (not statistically significant).

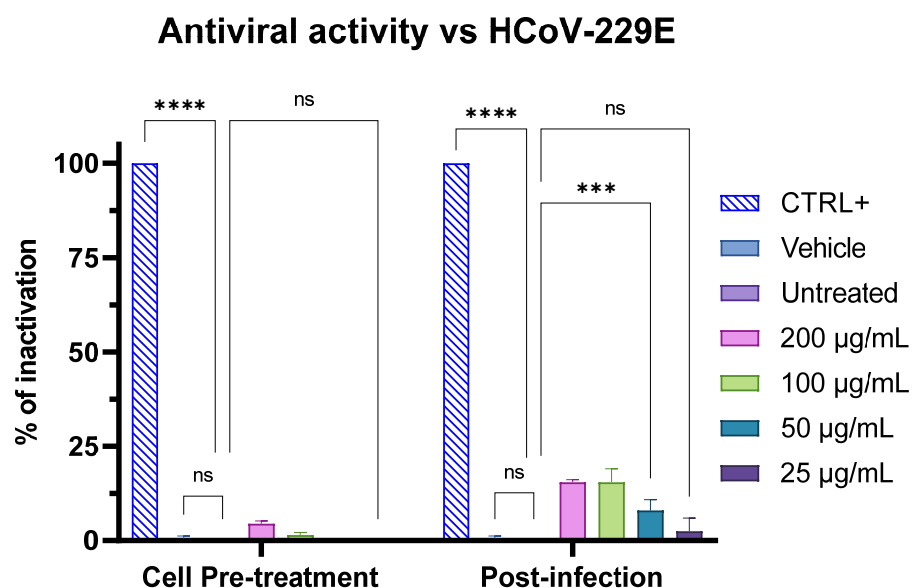

**Figure S4.** Antiviral activity of F2 against HCoV-229E in the cell pre-treatment and post-infection assays. Dextran sulfate (1  $\mu$ M) and aciclovir (5  $\mu$ M) were used for cell pretreatment and post-treatment, respectively. Statistical analyses were determined by two-way ANOVA with Dunnett's test for multiple comparisons referred to the untreated infected cells \*\*\*\*  $p < 0.0001$ , \*\*\*  $p < 0.0002$ , ns (not statistically significant).

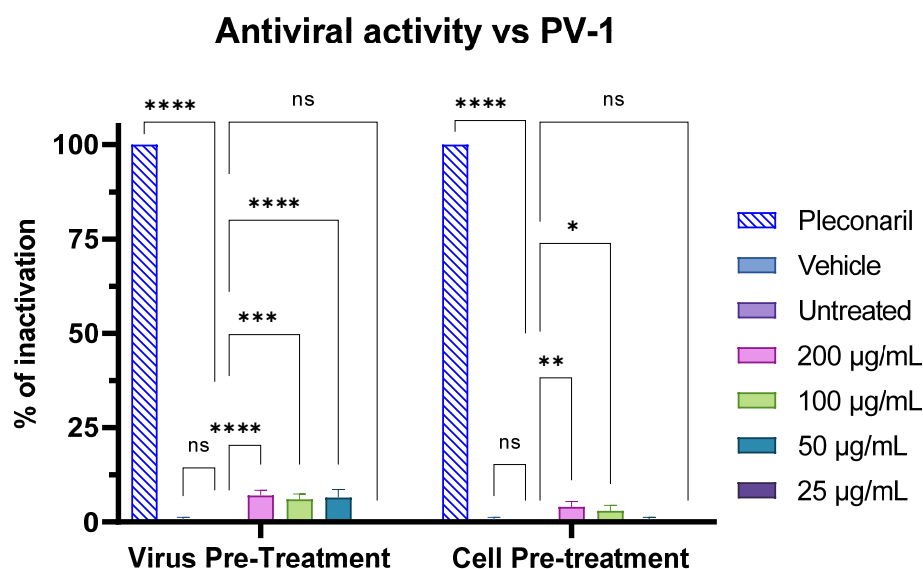

**Figure S5.** Antiviral activity of F2 against PV-1 in the virus and cell pre-treatment assays. Pleconaril 10  $\mu$ M was used as positive control. Statistical analyses were determined by two-way ANOVA with Dunnett's test for multiple comparisons referred to the untreated infected cells \*\*\*\*  $p < 0.0001$ , \*\*\*  $p < 0.0002$ , \*\*  $p < 0.0021$ , \*  $p < 0.0332$ , ns (not statistically significant).

ST. AUKEUS KRA  
31/12/15

SERVIZIO DI MICROBIOLOGIA

Cliente bioMerieux: S U N      Lab report      Stampato 27-nov-2015 11:44 CET  
N. sistema: 1498      Stampato da: LabAdmin

Nome paziente: [REDACTED]      \*\*\* Allerta applicato \*\*\*      ID paziente: 52187

Gruppo di isolati: 52187.11-1

Tipo di card: AST-P632 Test dello strumento: 00000B4D4CDB (1498)

---

Quantità organismo:

|           |                       |
|-----------|-----------------------|
| Commenti: | ATTENZIONE CEPPO MRSA |
|           |                       |
|           | ATTENZIONE CEPPO MRSA |

---

|                                   |                       |     |          |
|-----------------------------------|-----------------------|-----|----------|
| Informazioni sull'identificazione |                       |     |          |
| Microrganismo selezionato         | Staphylococcus aureus |     |          |
| Imnesso:                          | 25-nov-2015 10:33 CET | Da: | labadmin |

**Messaggi di analisi:**

Un test ICR positivo indica resistenza inducibile ai macrolidi, lincosamidi e streptogramina tipo B. Tale isolato si presume resistente alla clindamicina che tuttavia potrebbe essere efficace in alcuni casi.

Resistenza a basso livello - una MIC di 2, 4, 32, 64 per la mupirocina rappresenta l'intero range intermedio (2-256).

---

|                                 |             |                       |                  |           |                   |                       |
|---------------------------------|-------------|-----------------------|------------------|-----------|-------------------|-----------------------|
| Informazioni sull'antibiogramma | Card:       | AST-P632              | Numero di lotto: | 732366110 | Scade:            | 22-dic-2016 12:00 CET |
|                                 | Completato: | 25-nov-2015 20:07 CET | Stato:           | Finale    | Tempo di analisi: | 10,00 ore             |

| Antimicrobico                           | MIC    | Interpretazione | Antimicrobico                | MIC     | Interpretazione |
|-----------------------------------------|--------|-----------------|------------------------------|---------|-----------------|
| Cefoxitina screening                    | POS    | +               | Teicoplanina                 | <= 0,5  | S               |
| Benzilpenicillina                       | > 0,25 | R               | Vancomicina                  | <= 0,5  | S               |
| Oxacillina                              | > 2    | R               | Tetraciclina                 | <= 1    | S               |
| Gentamicina                             | > 8    | R               | Tigeciclina                  | <= 0,12 | S               |
| Levofloxacina                           | > 4    | R               | Fosfomicina                  | > 64    | R               |
| Resistenza inducibile alla Clindamicina | POS    | +               | Acido fusidico               | <= 0,5  | S               |
| Eritromicina                            | > 4    | R               | Mupirocina                   | <= 2    | S               |
| Clindamicina                            | 0,25   | *R              | Rifampicina                  | > 2     | R               |
| Linezolid                               | 2      | S               | Trimetoprim/Sulfametossazolo | 20      | S               |
| Daptomicina                             | 0,25   | S               |                              |         |                 |

+= Antibiotici dedotti    \*= Modificato AES    \*\*= Modificato utente

---

Versione di VITEK 2 Systems installata: 07.01  
Linea guida interpretazione MIC: EUCAST 2015\_MICETI  
Nome del set di parametri AES: EUCAST\_2015\_MICETI

Linea guida interpretazione terapeutica: Copia di EUCAST-based\_2015  
Ultima modifica parametri AES: 2-nov-2015 14:13 CET

Pagina 1 di 2

Figure S6. MRSA strain antibiogram.



st. aureus  $\beta$   
31/12/15

Cliente bioMerieux:  
N. sistema:

## Lab report

Stampato 18-nov-2014 11:06 CST  
Stampato da: labadmin

Nome paziente: 31/3/89  
Gruppo di isolati: 52279-1

ID paziente: 52279.10

Organismo selezionato: Staphylococcus aureus

|           |  |
|-----------|--|
| Commenti: |  |
|           |  |
|           |  |

|                                             |                       |
|---------------------------------------------|-----------------------|
| Informazioni sull'identificazione           |                       |
| Microrganismo selezionato                   | Staphylococcus aureus |
| Imnesso: 23-ott-2014 11:19 CDT Da: labadmin |                       |
| Messaggi di analisi:                        |                       |

| Informazioni sull'antibiogramma         |        |                 | Card:                        | Numero di lotto:      | Scade:                     |
|-----------------------------------------|--------|-----------------|------------------------------|-----------------------|----------------------------|
|                                         |        |                 | AST-P632                     | 732323640             | 24-ott-2015 13:00 CDT      |
|                                         |        |                 | Completato:                  | 23-ott-2014 17:48 CDT | Stato: Finale              |
|                                         |        |                 |                              |                       | Tempo di analisi: 8,25 ore |
| Antimicrobico                           | MIC    | Interpretazione | Antimicrobico                | MIC                   | Interpretazione            |
| Cefoxitina screening                    | NEG    | -               | Teicoplanina                 | <= 0,5                | S                          |
| Benzilpenicillina                       | >= 0,5 | R               | Vancomicina                  | 1                     | S                          |
| Oxacillina                              | 0,5    | S               | Tetraciclina                 | <= 1                  | S                          |
| Gentamicina                             | 4      | R               | Tigeciclina                  | <= 0,12               | S                          |
| Levofloxacina                           | 0,25   | S               | Fosfomicina                  |                       |                            |
| Resistenza inducibile alla Clindamicina | NEG    | -               | Acido fusidico               | <= 0,5                | S                          |
| Eritromicina                            | >= 8   | R               | Mupirocina                   | <= 2                  |                            |
| Clindamicina                            | 0,25   | S               | Rifampicina                  | <= 0,03               | S                          |
| Linezolid                               | 2      | S               | Trimetoprim/Sulfametossazolo | <= 10                 | S                          |
| Daptomicina                             | 1      | S               |                              |                       |                            |

\*= Antibiotici dedotti \*\*= Modificato AES \*\*\*= Modificato utente

|                          |          |                                       |                                                |
|--------------------------|----------|---------------------------------------|------------------------------------------------|
| Conclusioni AES:         |          | Ultima modifica: 8-apr-2014 09:18 CDT | Set di parametri: EUCAST2014+MICE Tlvers. 5.04 |
| Livello di affidabilità: | Coerente |                                       |                                                |

Azione  
Revisionato da: Nome (ID utente) (labadmin) Data/Ora 3-nov-2014 12:13 CST Commento

Versione di VITEK 2 Systems installata: 05.04  
Linea guida interpretazione MIC: EUCAST\_MOD\_2014 Linea guida interpretazione terapeutica: EUCAST-based\_MOD\_2014  
Nome del set di parametri AES: EUCAST2014+MICETlvers. 5.04 Ultima modifica parametri AES: 8-apr-2014 09:18 CDT

Pagina 1 di 1

Figure S8.  $\beta$ -lactamase producer strain antibiogram.

| REFERTO - FINALE                  |                              |
|-----------------------------------|------------------------------|
| Pagina 1/1<br>26/07/2017 10:08:46 |                              |
| Nome paziente:                    | ██████████                   |
| ID paziente:                      | 51883.07                     |
| Data di nascita:                  |                              |
| Sesso paziente:                   | Non specificato              |
| N accesso:                        | 51883.07                     |
| Tipo campione:                    | CATETERE VENOSO CENTRALE     |
| Reparto ospedaliero:              | 7301 TER INTENSIVA NEONATALE |
| Data ricezione:                   | 21/07/2017 09:49:51          |

**Nome organismo**

1 STAAUE Staphylococcus aureus

**Commenti****Marker di resistenza**

1 STAIML Fenotipo MLSb inducibile di Staphylococcus

| Antibiotico                 | STAAUE    |     |
|-----------------------------|-----------|-----|
|                             | MIC/Conc. | SIR |
| Acido fusidico              | <=0,5     | S   |
| Ampicillina                 |           | R   |
| Ceftaroline                 | 0,5       | S   |
| Ciprofloxacina              | >4        | R   |
| Clindamicina                |           | R   |
| Daptomicina                 | <=0,5     | S   |
| Eritromicina                | >2        | R   |
| Fosfomicina c/G6P           | <=16      | S   |
| Gentamicina                 | 2         | R   |
| Linezolid                   | 2         | S   |
| Moxifloxacina               | >1        | R   |
| Mupirocina alto livello     | <=256     | S   |
| Oxacillina                  | 0,5       | S   |
| Penicillina G               | >0,25     | R   |
| Teicoplanina                | <=0,5     | S   |
| Tetraciclina                | <=0,5     | S   |
| Tigeciclina                 | <=0,25    | S   |
| Trimetoprim-sulfametoxazolo | <=1/19    | S   |
| Vancomicina                 | 1         | S   |

Figure S9. QRSA strain antibiogram.

3/12/15

Stampato 20-01-2014 08.43 CDT

rapporto grafico microbiologia

Clinica ortopedica

Nome paziente: [REDACTED] ID paziente: [REDACTED]  
 Posizione: [REDACTED] Medico: [REDACTED]  
 ID lab.: 51119 Numero di isolato: 1

Organismo selezionato: Staphylococcus aureus

Prelevato: [REDACTED]

Origine: [REDACTED]

Commenti: [REDACTED]

| Informazioni sull'antibiogramma         |         |                 | Tempo di analisi: 9,50 ore   |         | Stato Finale    |  |
|-----------------------------------------|---------|-----------------|------------------------------|---------|-----------------|--|
| Antimicrobico                           | MIC     | Interpretazione | Antimicrobico                | MIC     | Interpretazione |  |
| Cefoxitina screening                    | NEG     | -               | Daptomicina                  | 1       | S               |  |
| Benzilpenicillina                       | >= 0,5  | R               | Teicoplanina                 | <= 0,5  | S               |  |
| Oxacillina                              | <= 0,25 | S               | Vancomicina                  | <= 0,5  | S               |  |
| Gentamicina                             | <= 0,5  | S               | Tetraciclina                 | <= 1    | S               |  |
| Levofloxacina                           | 0,25    | S               | Tigeciclina                  | <= 0,12 | S               |  |
| Resistenza inducibile alla Clindamicina | NEG     | -               | Acido fusidico               | <= 0,5  | S               |  |
| Eritromicina                            | >= 8    | R               | Rifampicina                  | <= 0,03 | S               |  |
| Clindamicina                            | >= 4    | R               | Trimetoprim/Sulfametossazolo | <= 10   | S               |  |
| Linezolid                               | 2       | S               |                              |         |                 |  |

+= Antibiotici dedotti \* = Modificato AES \*\* = Modificato utente

| Conclusioni di AES |                                                            |
|--------------------|------------------------------------------------------------|
| Affidabilità:      | Coerente                                                   |
| Fenotipo:          | MACROLIDI/LINCOSAMIDI/STREPTOGRAMINE   MLSB+SA COSTITUTIVO |

Figure S10. MLSB strain antibiogram
